# Supplementary material for: Effects of cadmium stress on seed germination and physiological-biochemical characteristics in okra: a comparative study of red and green varieties
Source: PeerJ journal article supplement (doi:10.7717/peerj.19498), 2025-05-28
Supplement: RAW_DATA.zip [file RAW DATA.xlsx]

## Sheet: red
Cd treatment inhibited plant growth
	0	0.5	1	1.5	2
1d	0	0	0	1	0
	0	0	0	0	0
	0	0	0	0	0
	0	0	0	0.333333	0
2d	15	13	8	11	7
	16	13	14	8	9
	19	12	13	10	8
	16.6667	12.6667	11.6667	9.66667	8
3d	23	15	18	17	14
	23	20	18	15	14
	25	25	16	16	16
	23.6667	20	17.3333	16	14.6667
4d	26	16	21	19	15
	24	20	20	16	15
	27	26	19	16	17
	25.6667	20.6667	20	17	15.6667
5d	26	17	22	19	16
	24	20	20	16	15
	27	26	19	16	17
	25.6667	21	20.3333	17	16
6d	26	17	22	19	16
	24	20	20	16	15
	27	26	19	16	17
	25.6667	21	20.3333	17	16
7d	26	17	22	19	16
	24	20	20	16	15
	27	26	19	16	17
	25.6667	21	20.3333	17	16
Chloroplastidic pigment
	Con			Cd
	1	2	3	1	2	3
A665	0.876	0.837	0.894	1.035	0.951	0.99
	0.869			0.992
A649	0.387	0.375	0.411	0.465	0.42	0.444
	0.391			0.443
A470	0.852	0.759	0.807	1.017	0.942	0.99
	0.806			0.983
ca	9.55764	9.09615	9.64362	11.2391	10.3768	10.7558
cb	3.2472	3.23316	3.71448	4.0302	3.52188	3.83544
cc	1.87603	1.50688	1.47269	2.16854	2.10782	2.15364
H2O2
	Con			Cd
Leaves	0.138	0.155	0.13	0.121	0.123	0.134
root	0.06	0.066	0.078	0.101	0.105	0.083
NPSH
	Con			Cd
Leaves	0.169	0.157	0.154	0.204	0.212	0.178
root	0.111	0.117	0.131	1.651	1.58	1.304
PRO
	Con			Cd
Leaves	0.1147	0.1028	0.1057	0.1304	0.1092	0.1041
root	0.0925	0.1055	0.0915	0.1513	0.1444	0.1489
Standard Curve
10	5	2.5	1.25	0.625	0.3125	0
0.398	0.237	0.145	0.109	0.096	0.088	0.07
biomass
		Con			Cd
shoot length	11.9	13.6	11.4	9，97	9.5	9.8
root length	24.6	26.2	25.8	15	11.7	15.2
fresh weight of shoot	6.7225	7.2298	6.7466	3.1366	2.9155	3.5529
fresh weight of root	2.2165	3.0955	2.7149	1.3245	1.3195	1.3555
dry weight of shoot	0.5592	0.5906	0.5706	0.3096	0.3798	0.2733
dry weight of root	0.1163	0.1391	0.1218	0.085	0.0795	0.075
POD
	Con			Cd
Leaves	0.235	0.253	0.222	0.366	0.404	0.353
root	0.08	0.062	0.047	0.963	0.94	0.804
SOD
	Con			Cd
Leaves	0.561	0.396	0.495	0.39379	0.368344	0.221904
root	0.477	0.458	0.312	0.753645	0.595052	0.802256

## Sheet: green
Cd treatment inhibited plant growth
	0	0.5	1	1.5	2
1d	4	3	0	2	1
	3	1	3	1	1
	2	2	1	0	0
	3	2	1.33333	1	0.666667
2d	15	13	10	11	8
	14	12	12	10	7
	13	10	10	8	6
	14	11.6667	10.6667	9.66667	7
3d	23	20	15	16	10
	22	17	16	13	10
	20	16	16	12	8
	21.6667	17.6667	15.6667	13.6667	9.33333
4d	25	22	17	18	12
	24	21	19	15	13
	23	20	20	14	12
	24	21	18.6667	15.6667	12.3333
5d	27	24	20	20	14
	26	25	23	17	15
	26	23	22	16	14
	26.3333	24	21.6667	17.6667	14.3333
6d	27	24	20	20	14
	26	25	23	17	15
	26	23	22	16	14
	26.3333	24	21.6667	17.6667	14.3333
7d	27	24	20	20	14
	26	25	23	17	15
	26	23	22	16	14
	26.3333	24	21.6667	17.6667	14.3333
Chloroplastidic pigment
	Con			Cd
	1	2	3	1	2	3
A665	0.978	0.933	0.945	1.356	1.224	1.368
A649	0.441	0.429	0.435	0.63	0.582	0.63
A470	0.93	0.897	0.936	1.377	1.242	1.362
ca	10.609	10.0638	10.19	14.5818	13.0706	14.7492
cb	3.8484	3.87828	3.9402	5.79888	5.56704	5.71104
cc	1.9039	1.75977	1.88888	2.78121	2.35147	2.75974
H2O2
	Con			Cd
Leaves	0.107	0.096	0.108	0.119	0.128	0.136
root	0.062	0.055	0.059	0.073	0.094	0.109
NPSH
	Con			Cd
Leaves	0.287	0.262	0.255	0.492	0.489	0.462
root	0.123	0.118	0.122	1.188	1.156	1.129
PRO
	Con			Cd
Leaves	0.079	0.085	0.102	0.155	0.193	0.178
root	0.091	0.107	0.101	0.302	0.309	0.311
Standard Curve
10	5	2.5	1.25	0.625	0.3125	0
0.398	0.237	0.145	0.109	0.096	0.088	0.07
biomass
	Con			Cd
shoot length	12.1333	12.5333	12.5667	8.5	9.3	9.8
root length	22.5333	23.6	22.0667	16.7333	16.5333	16.5333
fresh weight of shoot	6.16	6.2156	6.5772	2.306	2.8327	3.0783
fresh weight of root	2.0516	2.155	1.9245	0.8185	1.0317	1.02
dry weight of shoot	0.5011	0.511	0.518	0.2184	0.2644	0.2576
dry weight of root	0.0848	0.109	0.1086	0.0533	0.0637	0.0622
POD
	Con			Cd
Leaves	0.161	0.123	0.15	0.465	0.479	0.501
root	0.073	0.075	0.09	1.045	1.482	1.189
SOD
	Con			Cd
Leaves	0.318253	0.230127	0.290479	0.533996	0.437502	0.381783
root	0.210358	0.161213	0.135694	0.993572	0.844051	0.957041

## Sheet: Cd content
	Sample	Number	Weight (g）	Constant Volume (ml)	Content in solution (μg/L)	Content in sample (mg/kg)
green okra	Con-shoot-1	R1	0.4078	25	317.478	19.4628
	Con-shoot-2	R2	0.4092	25	105.617	6.45265
	Con-shoot-3	R3	0.4029	25	285.03	17.6862
	Cd-shoot-1	R4	0.4036	25	4379.04	271.249
	Cd-shoot-2	R5	0.4081	25	4607.23	282.236
	Cd-shoot-3	R6	0.4075	25	4720.69	289.613
	Con-root-1	R7	0.2668	25	424.865	39.8112
	Con-root-2	R8	0.354	25	125.373	8.85403
	Con-root-3	R9	0.2063	25	296.898	35.9789
	Cd-root-1	R10	0.1933	25	6434.26	832.16
	Cd-root-2	R11	0.223	25	8371.76	938.538
	Cd-root-3	R12	0.1831	25	6902.24	942.414
red okra	Con-shoot-1	R13	0.4039	25	354.495	21.942
	Con-shoot-2	R14	0.4059	25	110.729	6.81997
	Con-shoot-3	R15	0.4089	25	339.342	20.7472
	Cd-shoot-1	R16	0.4033	25	4627.49	286.852
	Cd-shoot-2	R17	0.4053	25	4258.09	262.651
	Cd-shoot-3	R18	0.4043	25	4681.48	289.48
	Con-root-1	R19	0.1868	25	426.789	57.1184
	Con-root-2	R20	0.2765	25	72.861	6.58779
	Con-root-3	R21	0.1669	25	279.207	41.8225
	Cd-root-1	R22	0.1741	25	5535.29	794.843
	Cd-root-2	R23	0.1318	25	1849.13	350.746
	Cd-root-3	R24	0.147	25	4631.06	787.596
	QC-Parallel Sample
	15	R15	0.4085	25	325.916	19.9459
	Relative deviation%					0.039385
	Qualified?					qualified
	QC
	GSB-27		0.4066	25	2.839	0.174557
			0.4062	25	2.865	0.176329
			0.4055	25	2.836	0.174846
	Reference value±uncertainty					0.19±0.02
	Qualified?					qualified
